# Supplementary material
Source: publisher site journal article supplement (https://www.spandidos-publications.com/7260/downloadSupplementary)
Supplement: Supplementary file 1 [file downloadSupplementary]

## Sheet: Table SIII
Table SIII. Genes positively and negatively correlated with sideroflexin 1 in lung adenocarcinoma.
Positively related	Negatively related
RARS	C22orf36
HMMR	SUSD2
CCDC99	TOM1L2
CCNB1	SMAD6
PGK1	SLC27A1
NPM1	LIMS2
RRM2	CPAMD8
MAD2L1	FXYD1
SGOL1	NFIX
NCAPG	INPP5K
UTP15	KIF1C
G3BP1	TNXB
PPAT	ELN
LDHA	ZNF362
CDC25C	ZBTB4
PANK3	DGCR2
UBE2T	FGFR3
CENPH	TRIOBP
MTHFD2	CRY2
RFC5	LDLRAP1
ERO1L	CEBPA
RNASEH1	THRA
RACGAP1	CXCL16
DEPDC1B	RAMP3
CENPK	DAPK2
DEPDC1	SEPT4
H2AFZ	KANK3
ANKRD32	TNS1
CCNA2	SELENBP1
HSPD1	C21orf2
ECT2	PLAC9
CASC5	CROCC
PBK	ADAMTS8
C12orf48	VSIG2
ESCO2	TMEM130
CCT4	FCGRT
GMPS	ACSS1
ZC3H15	UBTD1
IARS	TBX2
DENR	IFT140
ARHGAP11A	FBXW4
RAN	INMT
EXO1	MUSTN1
PRR11	MFAP4
CCNB2	C1QTNF7
UIMC1	USHBP1
BUB1	PNPLA2
CENPI	TENC1
PTTG1	ARVCF
PAICS	CCDC48
NUSAP1	SLC9A3R2
WDR76	SCN4B
NMD3	TNFSF12
PGAM1	RBMS2
CDCA2	CHADL
NAA15	CD81
VDAC1	TTLL1
EPR1	ARHGEF17
PGAM4	FAM116B
MCM4	LOC644165
GINS2	MEGF6
HNRNPAB	DLEC1
MPHOSPH9	HSPB6
RQCD1	CTF1
KPNA2	TNNC1
NUP155	PRX
MELK	SORBS3
DLGAP5	PTH1R
MCM10	ABTB1
PLK4	MMP23B
AK3L1	PLLP
MND1	ARHGEF15
FANCI	TBC1D17
SHCBP1	MS4A15
CYCS	TMPRSS2
AURKA	C1orf116
NOP16	PIK3IP1
PLOD2	C17orf103
CANX	RS1
THOC3	SLC27A3
KIAA0101	YPEL3
KIF4A	C1orf198
RPE	LOC80054
BOD1	CYB5R3
MRPL42	C2orf40
RAD18	IL17RE
KIAA1524	REM1
TARS	LDLRAD2
BUB1B	PCDP1
CHCHD3	BCAM
TOP2A	ATP1A2
KIF20A	TCF21
SPC25	FBLN5
CKAP2L	CLIC3
NEK2	TTC21A
GAPDH	HSPA12B
PSMD12	ZMYND15
TPI1	SLC43A2
ABCE1	SCGB3A1
NUP37	RNASE1
CDK1	LGI4
WDR12	NR3C2
PRC1	FLJ42875
CDKN3	CST5
TMPO	ZNF763
FBXO5	VIPR1
HSPA9	RAPGEF3
FAF2	CYP4B1
KIF2A	LEFTY2
NUF2	TNFSF13
RAD51	CD302
TYMS	IFT172
KIF18A	NAT15
CDC6	RILPL2
CENPL	SLC44A2
MCM6	FAM189A2
CENPE	LTBP4
KIF11	SH2D3C
HELLS	MOB2
TTK	ASAP3
ERGIC2	ENG
PPP1CC	ICAM4
ERCC8	GGT6
CHEK1	NPR1
EIF2S1	ATP1B2
NCAPG2	TEF
PRPF4	ZNF69
CDCA5	TAL1
PGAM5	FGFR2
ERCC6L	INCA1
GRPEL2	SRL
TMEM38B	PTPN21
ASPM	RPS6KA1
CKS2	KANK2
GFM2	MED26
TAF9	JPH4
RNF34	ESAM
ATAD2	CBX7
ARMC1	ADH1B
TMEM48	FOLR1
DTL	RAMP2
HJURP	SYNC
BUB3	SYT15
TIMM8A	KIAA1683
BRI3BP	ARAP1
ARHGAP11B	ADAMTSL2
CKAP2	PPFIBP2
EGLN3	BTNL9
ORC1L	MYH11
KIF23	PDK2
METTL2A	ARHGEF1
CCT7	RNF144B
SKA1	ADRB1
DBF4	CLIC5
KIF14	FHL1
NAA50	SLFNL1
CCRN4L	OSR1
YWHAQ	DES
PLK1	A2M
EPT1	C15orf59
CENPA	CNNM3
FANCB	TRIM3
CISD2	DARC
SEC24A	PLCD1
SKA3	PINK1
WDR67	PBXIP1
KIF15	SEMA3G
BIRC5	LTC4S
GPN3	ZDHHC1
YIPF6	FAM107A
ORC6L	JDP2
PNP	CYS1
ZWINT	ORMDL3
PRIM1	GGTLC2
SGOL2	FLJ11235
G2E3	SMG6
TPX2	METRN
UBE2V2	LTBP3
RPL26L1	CASKIN2
PNO1	KCNA5
CEP55	PRICKLE4
C4orf43	WWP2
EXOSC2	GFRA1
NDC80	SLIT3
WDR43	CNKSR1
CENPN	SPSB3
USP14	MMP15
MPP6	SEMA4A
GINS3	CD300LG
CLSPN	FAM22A
C9orf40	TDRD10
ETF1	NXPH3
GINS4	RPS6KA2
SSR3	METTL7A
VPS33A	TRIM8
SRP72	RSPO2
ATG12	CCND3
CALU	DENND3
RFC4	PRKCZ
ANLN	MXD4
C11orf82	GPR146
ELOVL6	CALCOCO1
CPSF3	C1orf133
STC1	ROBO4
YWHAG	CIRBP
RBM27	KLF2
MRPL3	TMEM204
NUP205	FIGF
FAM72D	ZBTB22
FEN1	SYNE1
XPOT	JMJD8
ZWILCH	ROGDI
RAD51AP1	PTGDS
MOBKL1B	RGMA
MRPS30	GRRP1
C2orf49	CACNB1
RAD23B	USP54
DSCC1	CASZ1
P4HA1	CCDC64B
METTL2B	C10orf107
HNRNPC	CYB5D2
PFKP	LRRC48
NCAPH	SKI
EZH2	CA3
OLA1	CHRM1
UCHL5	SOD3
FBXO45	LOC723809
CDC20	CASQ2
CDC7	LOC728392
OIP5	EPB41L1
FAM64A	CGNL1
NFXL1	GRID1
KRR1	TCTEX1D4
SPC24	PIGQ
BRIP1	SGCA
NAA35	PLA2G1B
LMNB1	HNF1B
KIF2C	SIDT2
POP1	LGR6
POLE2	ROBO2
FANCD2	RHOBTB2
GMNN	CCDC157
SFRS9	MAP6
PRELID1	DOK4
ZNF367	VMAC
FAM111B	MAP3K3
TRIP13	EPB41L4A
MAPK6	SLC16A11
DARS	KIAA1671
VBP1	HDAC10
ESPL1	ADH1A
KIF4B	PDLIM2
UNG	TPPP3
TMED2	CABLES1
XRCC2	AOC3
STIL	HDAC5
UBA6	FGF14
MCM2	PAOX
BRCA1	CST3
PPP2CA	C10orf116
KIAA1715	CCDC146
CCNE2	C6orf47
NEIL3	WDTC1
HSPE1	KLC4
SPAG5	RAI2
CENPO	FRAT1
GTF3C3	C16orf48
BZW1	RSPO1
FAM72A	CYBRD1
ARL5B	C22orf13
FAM54A	CD34
FAM72B	GNRHR2
DKC1	CTDSPL
RAD54B	PTPRU
TOPBP1	HSPB7
GART	CCL14
SSX2IP	PSD4
DHX15	CTDSP1
KIF20B	CLEC4F
NLN	NRIP2
POLR3G	EBF4
DNAJC9	PTPN18
PRMT5	PKNOX2
NME1	CLEC3B
NBN	EMCN
SAAL1	CORO2B
ALDOA	NEK8
SMC2	GGTLC1
R3HDM1	DHRS12
NEDD1	SEPN1
PWP1	B3GNT8
POLQ	JAM2
GTF2H3	ARHGAP23
MSH6	CLEC14A
ZCCHC9	PGAP3
SNRNP27	NWD1
GPRIN1	GPR116
SLC2A1	C16orf89
FAM162A	C1orf21
HAUS6	ARHGAP6
TOMM70A	CTSH
AVL9	TMEM88
NOL11	SCARA3
HSPA4L	SOX18
TBCA	TPPP
CCDC59	ALDH2
NUDCD2	GNG7
PTTG3P	INPP5A
PPP4R2	LRRC27
TMEM22	C17orf108
LOC729020	CAPS
PMAIP1	AGER
CCT5	ACOXL
CDC25A	ST6GALNAC6
GSTCD	PRODH
GPN1	RILP
C12orf11	SEC14L3
FOXM1	TBX4
PUS7L	CAPN3
STRAP	DNAH6
HSPA13	AMN
CKS1B	FAAH
GINS1	MYOC
MAPKAPK5	SLC5A9
HSPA14	MMRN2
CHAC2	DAPK1
LYAR	PPIL6
DIAPH3	RFX2
CDCA8	FGD3
DCUN1D5	CYP27A1
FAM83D	PITPNM3
MKI67	FUCA1
RAD54L	TOM1
OTUD6B	TMEM37
LOC399815	ADHFE1
TDG	RAP1GAP
HSPA4	KIAA0494
HOMER1	GATA5
RSRC1	DLC1
LOC441089	AXIN2
KNTC1	AK1
C9orf30	PEBP4
PDK1	GSTM5
MLF1IP	PGR
EIF2S2	TFEB
PDSS1	PI16
RFC3	GJC2
PPIL5	OGN
CDC45	SLC14A1
PDCD10	JMJD7-PLA2G4B
ASF1B	TBX5
POC1A	CCDC92
C12orf23	RAB4B
PGM3	PLD2
BNIP1	C2orf58
MASTL	TTC16
MRPS35	BRD1
DARS2	SCTR
MMP12	LOC149620
C3orf26	FRZB
PRPF40A	MOCS1
BRIX1	EGLN2
CACYBP	IGFALS
MRPL22	LRCH4
EIF3J	LMOD1
UTP6	SGSH
SUV39H2	CABIN1
MORF4L2	COL4A4
NHP2	MYO1C
CDCA3	CYP2F1
CENPW	GAS6
PTGES3	C5orf49
SRFBP1	LHFP
BRCA2	ARHGAP8
UBE2C	CYP4Z2P
TIPIN	PYROXD2
MSH2	ZNF575
NUDCD1	THSD1
RMI1	MAST3
MTBP	ZDHHC8
PSMD14	SHROOM4
ATP5B	SLC25A29
ZC3HAV1L	KIAA0513
RRM1	TMEM132E
CDK2	FOXF1
GTSE1	RCAN2
KPNA4	TLR5
FARSB	JUND
CDT1	LRRC36
UHRF1	TSPAN4
CCDC58	ITIH5
C15orf23	PLXNA2
TEX10	SGSM3
IMMT	ADCY9
HIF1A	C7
EIF4E	SPNS2
CCDC43	RXRA
ZC3H8	HDAC7
SRPRB	BTBD9
CEP78	UNC45B
GOLT1B	GRAMD2
TIMM17A	SETDB2
SAMD8	COL9A2
EXOSC3	SOX17
GAS2L3	KIAA0319L
MYBL2	BAIAP2
MRPL15	CNTROB
ACP1	CMTM7
YIPF5	ABCA8
PPID	EMP2
PCNA	WDR81
PFKFB4	NCKAP5L
GBE1	IL34
DNAJA1	CCDC159
CCDC138	AP2A2
UBE2K	ANGPTL7
STC2	DEXI
CWC27	LBH
ENOPH1	LOC90110
NDUFS1	HSD17B6
C9orf100	SMCR7
WDR75	GPD1L
SLBP	C20orf194
LOC100128191	LRRC56
SLC33A1	SHH
SLC30A6	ST6GALNAC1
AP3S1	AGAP11
DONSON	LYL1
RBL1	RASSF7
LSM12	PLA2G10
C7orf68	TMEM132C
TCP1	SLC44A4
DHX36	ACSBG1
CENPF	C20orf160
NRAS	SMAD7
ELMOD2	NEIL1
EIF2AK2	MAN2B1
AURKB	SFI1
CBX3	ALDH4A1
YARS2	C4A
UBE2N	GRN
PSMD11	MSLN
CUL2	CCDC102A
SBNO1	LTBP2
UBE2S	FAM179A
NAA25	DPH1
GSG2	TMEM8B
NCBP1	MAMDC2
SNRPD1	SNED1
GABPB1	ZER1
SPATS2	PPP1R13B
C1orf112	PODN
SNRPA1	SFTA1P
TROAP	ALDH3B1
C12orf29	LOC115110
WDHD1	GPD1
PTCD2	F11
C17orf53	TTLL10
SLC25A40	GNMT
WDR36	FAM3D
UBE2D2	C15orf52
MAP2K1	LDB3
KIF18B	ZC3H7B
GNPNAT1	C1orf93
CDC23	LHPP
PSRC1	SLC25A23
DDX21	SNX29
SRP19	TMEM125
POLA2	ECHDC2
C15orf42	NHLRC4
PNPT1	CELSR1
TMTC3	GAS2L2
TUBA1B	ZNF18
EIF2C2	ERBB4
TOMM5	CFD
C18orf19	CLU
TUBA1C	EVPL
KPNB1	TNN
EEF1E1	COX4I2
DCK	KIAA0892
POLE3	CYP2B7P1
HSPA8	PLCE1
C5orf34	SCUBE2
STOML2	SELP
XPO1	C11orf66
IPO11	HSFX2
YME1L1	CCDC115
C9orf41	SLC15A2
CDK8	DBP
LRPPRC	NXN
C1orf135	LDB1
RAB10	PRDM16
TIMELESS	GGT1
ATP5G3	ARHGAP31
ACTL6A	LCAT
LARP4	CHIA
TMED9	C13orf15
HNRNPK	DPCR1
LIN9	YPEL1
MRPL13	FBXL8
MAN2A1	UTRN
BLM	MGP
ALG10	CCDC17
SLMO2	C11orf61
CNOT6	RSPH1
ANKIB1	ZMYND12
TWF1	NAPSB
SASS6	VPS13D
TAF1A	TNFRSF14
SAR1B	EFCAB6
ABCF2	DTX4
FAM60A	VAMP2
HCCS	DDAH1
KIFC1	PLEKHM1
E2F8	LRRC4B
SCML2	CCDC147
ATAD5	ARRDC1
SLC36A4	NEDD9
CCT3	PTGIR
CLDND1	CCDC42B
RACGAP1P	SHE
SEC23A	ACTN2
F12	TRPM4
HLTF	RGN
GPI	CRYM
GLRX3	VEPH1
SKP2	KIAA0427
NUP54	S1PR4
GNL3	LRP2BP
FAM199X	CLCN6
RFC2	RFTN1
SMN2	MYOZ1
ORC5L	CHRNA2
TRAIP	PHLDB1
TCERG1	KLF15
DNA2	C11orf52
CSE1L	HECTD3
MTIF2	FXYD6
SLC30A5	FAM46B
CCT6A	C19orf44
CSTF3	AMOT
TRA2B	CHAD
HMGB2	LAMB2
C4orf46	RGS22
LUZP6	COL4A3
PSME3	TBRG1
IMPA1	SCAMP2
PAWR	WFDC1
HBS1L	CYP2S1
LOC728554	ITIH3
HPRT1	HSPG2
TFAM	MMEL1
ASNS	EFCAB4A
DDX41	BBS1
MFN1	SGSM2
SRPK1	CAMTA2
RFWD3	RASIP1
E2F7	DPEP2
KCMF1	GRIA1
PSMC3IP	PGPEP1
MYBL1	SPARCL1
C6orf150	C10orf105
SNRPG	CDH5
RINT1	ARHGEF2
LOC388955	RERE
ZNF207	ICAM5
PSMA6	KCNRG
SENP1	CYP4Z1
SCFD1	SMPD1
MRPL30	PAPLN
MTFR1	GGA1
LMAN1	GPIHBP1
UBE2MP1	C7orf41
URB2	IQCK
PRKDC	IDUA
UMPS	PALMD
CCNE1	NOVA2
BOLA3	NAPA
CDC27	CACNA1C
COPS8	SLC38A10
ATL3	MAPK10
VRK2	CABC1
RPAP2	ABAT
UBA2	CYP21A2
AGPAT5	ACADS
TK1	LOC284440
RECQL	UNC93B1
LARP1	EPS8L1
TNPO1	PRELP
UBQLN1	GPR123
MRPL1	KLHL26
HDAC3	SCN2B
PKM2	ADCY4
EME1	HMGN3
L2HGDH	HPSE2
INTS7	C17orf59
TXNRD1	VWF
VDAC2	SDPR
MTDH	COL14A1
PDK3	EVPLL
HAT1	GDF10
RNASEH2A	SCARF2
TACC3	ZNF423
MRPS27	PEX11G
HSP90AA1	GPR17
DCAF13	HIGD1B
MRPL35	PRR24
C5orf43	RFX1
ZNF259	VPS53
WSB2	GRASP
DHFR	TMEM119
C12orf24	CCDC101
STIP1	SPHAR
MAPRE1	PLD3
DSN1	JUN
MCM7	ATP13A4
OBFC2B	CRTC1
GDI2	DAB2IP
GRPEL1	ADARB1
GTPBP8	EXD3
UGP2	VILL
PA2G4	PYGM
ZFAND1	C1orf88
ABCB7	CCDC96
GGH	ATOH8
TRIM59	AUTS2
RG9MTD1	RNPEPL1
TMX1	CAV3
CAPZA1	COX7A1
DTYMK	WIF1
FANCG	TLE2
RPAP3	CYGB
C8orf76	LOC441869
LOC647946	B3GALT4
POLR2D	KCNQ1
PCSK1	COL6A6
APOOL	PLA2G4F
PAK1IP1	DPYSL2
FBXO22	LOC401093
FANCA	HR
FKBP4	AQP5
C19orf48	SLC7A10
GTPBP4	ACSS2
CSTF2	ANGPTL5
SEC61G	SCN11A
VRK1	CLUAP1
EIF2B1	FAM82A1
TMEM106C	GANC
RNF14	PDGFA
TCEB1	LAMP1
POLR2B	NTRK3
STAMBP	HSPB2
GATC	FAM150B
LRRC42	FGD5
CCT8	CITED4
CTPS	VWA3A
UTP18	PRKCE
ECE2	TRIM13
TAF13	FAM117A
C13orf37	SNTN
AP1AR	SPATA18
NOP58	PLXNB2
SCYL2	CAPN11
IMPAD1	PPDPF
FANCM	HRASLS5
MAPK8	VGLL1
ISCA1P1	MAN1C1
PRMT3	AKAP13
CHAF1B	C1orf101
USO1	MOSC2
PPIL1	OCEL1
PSMA5	ALS2CL
MEST	PXMP4
USP1	TCTE1
ERLIN1	GNPTG
MARS2	NOD1
SKIV2L2	ITGA9
LRRC59	SSC5D
GTF2E1	EDNRB
YWHAZ	MYH14
SF3B14	APLP2
RIF1	WSCD2
TAF2	WTIP
ISG20L2	EFHC1
DCUN1D1	FAM53B
PRTFDC1	SFTPD
C20orf24	ZNF319
PSMA2	MYL3
GRSF1	TAX1BP3
CNIH	LMO2
FAM91A1	POLDIP3
FAM136A	GPC5
RDM1	ARRB2
SUZ12	PLXNB1
C12orf43	C9orf7
LARP1B	ABHD14A
RPF2	SESN1
TIMM9	PDE4C
LOXL2	PECAM1
C2orf69	DUSP27
RBM22	C1orf87
SIP1	SULT1A2
PELO	MOBKL2C
STRN3	PLD4
GOT1	LOC284837
FAM104A	KIF6
DDX52	COBLL1
MOBKL3	ARFGAP2
UBXN2A	TNK1
CDCA4	LRRC50
KIAA1191	CNGA4
NAMPT	TUBGCP6
GNG4	ZDHHC7
C5orf15	DAAM2
TMEM161B	LEPREL1
SNRPF	DUOX1
ORC2L	ARHGAP27
RBM28	PLSCR3
AAGAB	RNH1
B3GNT5	CNTN6
SSBP1	MAP1LC3A
TMEM206	RBPMS
CNBP	MYOCD
MCM8	TRIM39
EPHA6	FOXP4
UBTD2	PITPNA
FADS1	LMF1
GMCL1	EML3
GEMIN5	CDK10
ZNF639	NOSTRIN
MYNN	CKB
PRPS1	TIE1
THOC4	PRCD
EIF2A	KIAA0408
HMGCR	CCDC114
INTS8	HYI
ACTR6	CALML4
LIN54	LDHD
ILF2	MFRP
KCTD6	C12orf69
PSMA4	ABI3BP
ELOVL4	LDB2
HEATR1	TMEM163
GAL	FLJ10038
C16orf61	RGS5
CAND1	CDO1
PSMD2	CYP4A11
DDX18	CCDC30
PYGL	CCDC81
CLDN12	F10
WDR3	ZBTB7C
PDZD11	PRG4
CIRH1A	BZRAP1
ACLY	MGLL
CISD1	C2orf54
EXOC5	SCN7A
MFAP3	CCDC152
FAM40B	C9orf9
NDUFA9	ARHGAP24
IFRD1	ODF3B
DCTPP1	GARNL3
C13orf27	KIAA1529
NDUFB5	TMEM91
DDX55	GHDC
DSG2	NEGR1
ATP13A3	RAB11B
RIPK2	MYH1
C12orf73	DGCR14
DIMT1L	TEKT3
NT5C3	C1orf186
CCNF	ISLR2
PSMB5	PGM5
BTF3	ZNF837
DAD1	PDZD2
PPTC7	C11orf35
H2AFY	NCRNA00092
N4BP2	APBB1
LNPEP	SOX13
MED28	ZNF446
STARD4	CLEC16A
SNAPC3	PLCB2
PFN2	PRR15L
CHORDC1	RNF175
SKA2	WASH2P
TFG	GDPD5
PKMYT1	SLPI
WDYHV1	CYYR1
CTSL2	TMEM220
C9orf140	ITGA8
SDAD1	MYBPHL
FBXO43	NISCH
CPSF2	CTSG
MYO19	NICN1
NOLC1	CCDC37
ACTR3	SGK223
TMED7	MIB2
TTC1	SVEP1
SLC25A32	DPP7
NOL10	TEAD3
RIMS2	RAB11FIP3
TPRKB	SHANK3
MRPL21	TMEM133
NKRF	SOSTDC1
SHMT2	PPP1R9B
CTDSPL2	HRASLS2
MTL5	CCL16
C10orf119	OTC
TRNT1	EHD2
FAM114A1	KIAA0467
MGC87042	HDAC11
IQGAP3	ABCC10
C17orf71	LCN6
EIF4A3	C16orf71
POC1B	WFIKKN2
IPO7	CXorf36
CRIPT	TMEM115
MRPS22	NFATC1
LOC144438	PHYHD1
EXOSC9	FAM125B
MAPK9	PPIL2
HSP90B1	ZCCHC24
NCAPD2	FCGBP
CEBPZ	ACCS
C5orf22	APOD
PPIF	MST1P9
GYG1	PTGER1
UBE3C	L3MBTL2
TMEM209	PER3
NDUFB6	ZBTB16
IKBIP	C4orf31
MDH1	GLIS2
FXR1	C1orf92
E2F2	C22orf29
FGFR1OP	ITGA7
TRIAP1	AQP3
BCCIP	GPR44
CHRNA5	FOXS1
NOC3L	EXOC3L
PAQR3	MVP
MMADHC	LOC100129550
EPRS	IL11RA
BARD1	FLJ90757
MRPL44	C2orf55
NIP7	UBL3
PREB	PDE4A
HNRNPR	C3orf62
SLC39A14	FHL5
PPHLN1	RABL2A
DERL1	CTNNBIP1
MEMO1	ELANE
PSMA1	MGAT3
C17orf80	TST
C6orf167	STARD13
DIABLO	CACNA2D2
IPO8	MED15
GEN1	BBS5
TSR1	MXRA8
MYL6B	GIMAP1
C1orf163	SYTL1
SNX6	UXS1
TMED7-TICAM2	PTK2B
COPS5	LRRN3
DEK	SUFU
UTP20	TEKT2
THUMPD3	DUOXA1
SRPK2	ESYT3
SMNDC1	GGT5
C17orf75	ABCC6
FUBP1	PRICKLE1
CDKN2AIPNL	MBL1P
DUS4L	EZH1
UCK2	ProSAPiP1
ARNTL2	STAT6
SNAPC1	ZBTB47
VWDE	GSN
NPEPPS	FITM1
ARL6IP6	C21orf63
TUBG1	WNT3A
KCND2	GGT3P
EED	MAL
GFM1	ARMC5
CHD1	SLC5A2
VDAC3	C17orf50
ZNF346	MAOB
GLRX2	C17orf97
SMC4	RTN4RL1
PTPRN	PMM1
SCLT1	ST5
SCAMP1	SSBP4
NECAP1	HLF
RBMX	PNMAL2
HAX1	TOB2
PHTF2	ZSCAN4
OGDHL	KLHL30
PHF6	AATK
FASTKD1	EPS8L2
NIPA2	TMEM190
PSAT1	MPND
BBS7	C18orf16
KIAA1429	PLEKHM1P
LMBR1	RASL12
ENO1	CHMP6
MRPS10	RTN4R
MT1H	AMY2B
UHRF1BP1L	TOLLIP
TMEM194A	FRY
MRPL19	TNKS1BP1
TGS1	C9orf98
AGFG1	C1orf129
TTF2	FKBP8
MTRF1L	SLC47A1
HOXD11	JMJD5
OPA1	PHLDA3
TPM3	UBQLNL
MTCH2	C6orf132
NAE1	SCARF1
SPTY2D1	ZBTB46
E2F5	CX3CR1
CEP76	RABL2B
PSMD7	SUOX
LHX2	RARA
PAFAH1B2	PLIN5
MARS	ZNF540
LLPH	PNMT
NUS1	RALGPS1
RPS6KB1	TPRG1L
ZC3HC1	DYNC2H1
ZNF143	PLCH2
PIF1	KIAA1407
C14orf118	PTK7
G3BP2	C5orf38
PPIP5K2	UPF1
STYX	CYTH1
PA2G4P4	CCDC60
TRIM9	ATP6V0A1
TAF7	C22orf27
MRPL33	POLR3GL
C21orf45	RABEP2
RUVBL1	GATSL3
FBXO22OS	MGRN1
FAM49B	SPOCK2
MLLT11	ZNF211
PRDX4	GPR172B
RBM12	PRMT8
PCNP	CD1E
XRCC4	RAB36
USP15	KLHL22
INCENP	FAM47E
NOP14	SLC16A5
COMMD8	WDR65
PPP2R5E	PRSS8
SLC25A3	LRRC4
EIF2S3	KAZ
PHF19	ERCC5
E2F6	MPST
XRCC5	MAP3K11
MRPL11	ALPP
COPS2	NTF4
PKIB	SAPS2
HDAC2	S1PR2
PM20D2	PALM
DNAJC6	CPM
METAP1	ERVFRDE1
YRDC	C22orf25
IL12RB2	SH2B1
PAIP1	DAGLB
NDUFB3	MFSD7
WASF1	ASPA
PPM1G	VWA1
RPL22L1	SUGT1L1
OXNAD1	MUSK
TBK1	FAM182B
DRP2	RASGRP2
PPP1R12A	VWA3B
CBWD3	DHH
LSM11	CCDC12
VPS29	C6orf103
HAUS2	SULT1A1
TMEM39A	GPR133
CCNT1	TEKT4
MATR3	TRADD
FOXN2	SLC25A34
BNIP3	RHBDF1
LBR	CYP1A2
MKI67IP	DOCK9
NUDT21	ARHGAP1
CDC73	ALDH5A1
NDUFAF2	LOC144571
ZFR	SPNS3
NDRG1	SUN2
PHAX	ERG
CHAF1A	MAP3K6
CPD	GLTPD1
MTHFD1L	CDK11B
UBE2W	CHKA
DDX1	TGM1
PFDN4	SLC12A4
DNM1L	DMD
TXNDC9	P2RX2
SLC20A1	RASGRF1
DLAT	C10orf32
CLGN	ZNF554
MIER3	SIGIRR
C5orf44	DNALI1
PSMA7	ID4
TSPAN17	PLA2G16
AIMP2	TBC1D2
SFXN4	NUCB1
CCDC90B	MICAL1
RPP14	PPL
MRPL47	ZNF444
SSRP1	TMEM63A
MTHFD1	PRDM6
MESDC2	C10orf54
LOC645166	WDR16
SLC7A5	OSCP1
MGC14436	FMO2
UBE2F	DLX3
RSPRY1	CMTM5
CHMP2B	MEOX1
SRP54	C9orf117
MDH2	SSBP3
PCGF6	CYP2A13
HINT1	C11orf88
GPR180	RSPH10B2
MINPP1	LARGE
C16orf87	DNAJC4
NDUFS4	PLEKHM2
TACO1	ZNF497
NHLRC2	OLFML1
WHSC1	PNKD
DNAH14	TAPT1
NOP56	ADAMTS10
RAE1	FBP1
ARPC3	TNNT3
ENY2	DNAH7
COCH	PAQR8
GARS	GTF2IP1
AVEN	MUC1
FKBP3	CNTFR
RPL7L1	TMEM98
UHMK1	NINJ2
HMGXB4	SPAG8
PLAA	FREM2
NCAPD3	EDN1
UBE2E1	CD151
RAD50	KCNE1
ANAPC10	PHACTR1
FAM53C	SFTPC
MINA	CCDC65
SNHG6	DNAH9
TMX2	NKD2
NEDD8	RASL10A
LRP12	RPL13AP17
PHB	FNDC5
SLC38A1	CLEC1A
CDC5L	FES
MAP3K2	NOTCH1
TMEM70	GDF7
HMGXB3	LOC92973
SPIN4	CYP4X1
TMEM167A	CD164L2
SLC25A5	FRS3
C14orf129	NUMA1
2022-03-06	MEOX2
RBBP7	CAT
RBBP8	COMT
SEMA4B	ZNF580
PTCD3	PRSS12
RANBP1	CTSD
RIPPLY2	ASPRV1
OCRL	LGALS9C
POLR3A	NFYC
METTL11A	TTC25
ERI1	PGC
C1orf43	CDKN1C
KCNV1	PTCH2
MBTPS2	SIRT3
CSNK2A1P	ZMYND10
PNPLA8	GPR162
ATP2A2	ADAM33
GNAI3	WDR93
PTPLB	AVPR2
LYPLA1	IVD
NIF3L1	MMP24
LOC221710	DNAI2
POLR1B	CCDC108
HK2	TXNRD2
C4orf29	NPC2
ELK1	SYNE2
MRPL37	NOTCH4
ATP6V1A	IRF2BP2
C1orf96	COL21A1
RGS20	ADRA1A
NDUFAF4	C9orf24
EBNA1BP2	NAPSA
GTPBP10	PER1
HELB	MAGI1
PDIA6	PLEKHH2
USP37	CCDC61
WBP11	RIN3
CKAP5	SCGB1A1
SLC7A1	CDK18
ETFA	ANGPT1
ZUFSP	LOH3CR2A
RNGTT	OXER1
HIST1H2AG	KAL1
SLC25A21	C16orf58
KIAA1033	ZNRF3
CIAPIN1	OVGP1
SCOC	GPRASP1
ATP1B3	GLCCI1
EIF3M	C20orf56
SLC16A1	PID1
C5orf24	C7orf23
PSPH	RGS9
COPB2	PPM1M
MRPL50	C6orf217
RBM45	SYNPO
RPA3	ALOX15B
SFRS7	REPS2
METAP2	IGFBP4
C7orf49	GLTSCR2
IPMK	TGFBR3
OSGIN2	GATA1
MAGOHB	GATA6
PTDSS1	FLJ33360
COX7A2L	MAPK15
PHKA1	ADPRH
PARP1	AZU1
TUBB3	PRKCD
CMAS	SLC25A42
CEP152	FAM154B
NUP107	POPDC2
VAPB	GALNTL4
BDP1	GPR137
ZNF718	GALNT11
JMJD6	TSPAN9
NDUFA12	CCDC39
MED27	ZNF688
CCNI	SUSD4
CYC1	C3orf54
C12orf45	C3orf36
CCT2	AQP4
TBC1D23	CLDN9
POLR2H	TPSB2
TRPA1	WWC3
NAA38	LOC100287718
MGC45800	WFS1
TSGA14	MED25
MRPS17	GP9
WDR41	TEK
FAM45B	BNIPL
GMFB	C6
CAPRIN1	TMEM212
POLA1	C15orf56
EFTUD2	TTC7A
CYB5R4	MED11
SMARCAD1	LOC151009
B4GALT6	TMEM80
CENPQ	PCSK7
TREML3	TTC28
DNTTIP2	PLCL1
PSMC6	LYNX1
UBE2Z	DOK7
SPTLC1	ERN2
MTERF	BMP4
C3orf17	AHDC1
RBM7	C1orf158
LHFPL5	SLC6A4
TFRC	TSC22D3
TIFA	LRRC18
DAP3	KIAA1274
CACNA1E	PTRF
TPI1P3	HSD17B13
GPC6	ALG12
MPHOSPH6	AP1M1
NUP43	GLB1L2
MRTO4	IFT57
ITCH	VPS11
TERF1	SLC29A1
TMEM5	TEPP
UQCRHL	LMF2
PPP1CB	TMEM102
LARS	CLN3
CHUK	GAS7
QSOX2	TTLL6
COPS4	SGK269
UTP14A	CHST12
C1orf74	ZCWPW1
TWISTNB	ZZEF1
TMEM135	APOBEC4
SLC9A7	APOB48R
LOC729082	RIPK3
GPR19	SFTA2
TRMT61B	ANKRD45
AMMECR1	GFI1B
YTHDF3	TMEM232
RAD21	TTLL9
MCF2L2	DACT3
SLC27A2	C3orf42
SFRS1	ZSCAN18
MCFD2	ATF7IP2
IPO4	NIPAL3
SUV39H1	KLHDC1
LRRC40	FCAMR
CDH7	LMO7
SMAD5	TAB1
HAUS1	ABHD14B
MTERFD1	ZNF835
LOC286467	DNM2
LOC550112	UBXN11
COPS3	TUBA4B
PTRH2	LHFPL3
CSNK1G3	MYL9
COX7B	PWWP2B
PPME1	DCDC2B
MMD	LOC728264
HYLS1	ACVRL1
CENPM	N4BP1
PAIP2	FAM83E
PTS	NAT6
KIAA0020	LOC100271722
MSH3	CSDC2
SLC6A15	DKK3
RIOK2	RASSF10
PPP3R1	FOXF2
GLMN	PIP5K1C
PLRG1	EFEMP2
ORC4L	SEMA3B
ANAPC7	CASC1
WDR53	ZRSR2
SLC4A1AP	WNT11
LEO1	DEAF1
NUP62CL	RSPH4A
C5orf30	SLC26A9
C7orf44	CCDC8
MGC57346	TLR2
IAH1	C6orf226
OSTC	OSBPL7
PMS1	PRAM1
ARL6IP1	HPS1
FAM96A	SLC6A9
WDR45L	DYNLRB2
UQCRFS1	SULT1E1
MRPL45	COQ4
AGMAT	ZCWPW2
FGFR1OP2	ART4
ATP5C1	C8orf85
INHBE	ARRDC2
PROX1	HLA-DQB2
VMA21	RAB11FIP1
PACRGL	IRX3
CHM	C6orf97
CCNC	BMF
CDCA7	PION
LOC649330	LLGL2
NETO2	PPP1R14A
CCDC75	DISP1
FLVCR1	LAMB2L
ANGPTL4	ACSM5
BCAS2	ACSM3
NUP35	TRAPPC6A
FER	ELFN2
THOP1	EPHA4
RAP1GDS1	FAM162B
COPB1	TNRC18
TSN	CCDC94
DDX23	MYCT1
PARP2	SLC39A13
C16orf59	WNT2B
GLA	EFHB
PRDX3	ARHGDIB
NSMCE2	TSPO
RHEB	GTPBP1
TMEM182	DYRK1B
FYTTD1	SIGLECP3
PITX1	CLUL1
C2orf3	AMY2A
ZBTB26	RAB20
NUP210	SEMA6D
POMP	MS4A2
SUPT16H	C9orf152
PSMD1	C13orf30
GNPDA1	FAM13C
CORO1C	IL28RA
NCKAP1	CACHD1
ZCCHC7	ALPL
KIAA0090	RRBP1
TCOF1	CLDN18
C12orf5	MFNG
HOXD13	WFDC2
ARL5A	VASN
C9orf80	ROM1
ACRV1	GHRL
RAB3B	PTCH1
YES1	CAMK2G
SMS	CAMKK1
PSMD10	ST6GALNAC2
RIOK1	IYD
MRPS18C	AKNA
RAB1A	AMY1A
E2F1	ARAP3
AHCY	ZMIZ1
LOC402377	KLHDC8B
AZIN1	C10orf79
TMEM49	AQP1
STAU2	SOX7
PSMA3	BRF1
CDK7	C11orf2
HPS3	HRC
STRN	FOXA2
FAM158A	RICH2
ELOVL7	PRICKLE2
SAP30	FAM100A
POPDC3	GGA2
SNX12	TRIM26
LCLAT1	SAMD14
COQ3	IGSF10
PTPN11	SPRY1
RECQL4	CYP3A7
EGLN1	HPGDS
GOSR2	CASS4
TRMT6	MAPKBP1
GCLM	LGI3
COIL	NPIPL3
LOC222699	GRIK4
CDCP1	LY6G5C
BRAF	AGAP3
PITPNC1	ZNF19
PSME4	MTSS1L
HIGD1A	WDR38
RGP1	ECT2L
CS	CISH
FBXO30	NCALD
C15orf44	C2orf62
DCTN5	CRIP2
NDUFAB1	PZP
SNRNP40	INPP5B
EIF4A1	CDHR4
CPE	MPL
SKP1	HAAO
UBE2D3	WDR78
APOO	MYO15B
PGM2	HSD11B1L
TMEM74	DKFZP586I1420
C18orf54	CCDC57
POT1	HLA-DMA
TFDP2	ATG16L2
ELL2	SLC41A1
ANP32B	FCER1A
TIAL1	S1PR1
MAP3K7	EPDR1
SET	ALS2CR12
DPM1	ALDH16A1
HNRNPL	TSC2
DNAJB11	DNAH10
CUL4B	C6orf89
HARS	LOC283070
PTHLH	EIF4ENIF1
PDHX	ELMO1
C6orf182	DNASE2B
MOCOS	TMEM175
RPRD1A	TPSAB1
GNB2L1	GTF2IRD2P1
CALCB	KIF16B
C13orf34	SLCO2A1
LSM5	ZNF493
SLC6A17	B3GNT9
NKAIN1	DNAJB2
AMD1	C9orf171
PSMD9	BAHCC1
TRUB1	ODAM
WDR55	TXNIP
MRPL51	NFIA
UBE2NL	CFP
KHDRBS1	ABCA10
QSER1	FBXL15
IPO9	CPNE2
CLNS1A	DDR1
DLL3	PRR5
MCTS1	C1orf183
C8orf59	DEF6
DHX37	FAM149A
C7orf40	SLC44A3
FH	PPP1R14C
DDX39	PUS10
RTCD1	TGFBR2
NLE1	SORT1
ROD1	SLC22A3
DCLRE1A	C20orf85
RAD51C	LRRC46
PMS2L1	PCSK4
TMEM33	FAM22D
P4HA2	GLB1L
RPP30	C1orf141
FUT11	PTRH1
COPS6	CXorf59
TTC37	FBXO2
MTPAP	CCDC13
MRPL12	DUSP8
ATP5F1	ARSA
SNRPE	TNK2
APEX1	DNAH12
RC3H2	CLDN23
PSMB7	SORBS2
RSL24D1	CCDC88B
TAF1B	ZDHHC11
MRPS7	SYT8
TLK1	SLC5A4
CHCHD4	PCDH15
TUBGCP4	FAM167B
SCG5	CYP17A1
POLR2K	POLR3H
STEAP1	MST1P2
POLR3D	SCGB3A2
UQCRC2	SMPD3
PUS7	ABCD4
PSMC2	NR1H2
GREM1	GUCY1A3
TEX15	DENND1C
GANAB	ANKMY1
NME2	DNAL4
CHMP5	MYH10
DR1	FLYWCH1
C10orf18	CRYBB3
PSME2	NLRP1
CENPP	AGR3
CSNK1A1	C20orf195
KPNA1	ANO2
FIGNL1	BDNFOS
ASNSD1	SLC7A8
SHOX2	AFF3
UQCRH	ANKK1
OR51E1	GALNTL1
KLHL5	POM121L9P
NSUN2	NPNT
EIF4EBP1	C2orf24
PRMT1	ACVR2A
ACN9	ITFG3
MXD3	TCEA2
SPP1	SCP2
DUSP13	SCMH1
EAF1	TRIM71
STX18	FLII
DDX47	NDRG2
TIPRL	TACC1
SNRPB	LAMA2
VTA1	HMHA1
YIPF4	WDR63
KIR2DL4	SOBP
DHX9	HLX
TFDP1	TXNDC6
PRR7	C20orf108
ZNF131	FEZ1
CCDC150	ANXA11
CHCHD2	TMEM100
RBM18	ZFPM1
LASS6	GKN2
ATP2B1	SLC35E2
DNAJC10	ANKS3
PCMT1	FAM180A
LSM3	EPHB6
CCDC34	CD37
C2orf44	USP43
KCTD9	HEYL
TPD52	LOC91450
DLD	RGS11
VGF	TMPRSS7
ITGB1BP1	FOXI2
ATIC	ADRB2
ACTG1	CA5B
ZNHIT3	MRVI1
ASAH2	STK19
RPP40	C1orf194
TSSC1	NLRX1
COG5	IGFBP7
PDRG1	CD22
C9orf46	DGCR6L
RDH11	C20orf132
ZCCHC8	AP1B1
LOC150786	BLOC1S3
COQ2	LRSAM1
RPS6KC1	RRAD
SEH1L	ANGPTL1
SELT	TJP3
TCF19	FBLN1
RABGGTB	NRN1L
BZW2	H1FNT
PPP2R2A	KIAA0284
ANAPC5	C2orf73
PRDM4	C15orf26
COQ5	SETD4
IL8	ACAP3
ANAPC1	ARRB1
SR140	HMCN1
MAGT1	HAGH
MRPS14	TRPC2
PCDHGA1	C20orf200
SSB	GGTA1
C12orf4	MALL
HMGA1	MKL1
COX5A	RHOJ
CD274	PPP1R15A
SENP2	KLHDC7A
PPP1R15B	SLC26A8
NUDT2	CES2
RSL1D1	CD1C
ALDH1B1	CRIP1
UBL4A	ANKFN1
PSMD6	HSPB3
KDM3A	RASGRP4
LOC729176	TIAF1
AACS	LOC399744
TAC1	GIMAP8
BATF3	GORASP1
SNX7	ZNF219
MBD4	RIBC1
FKTN	NAGPA
C4orf21	EFCAB1
WBP11P1	ZSWIM7
AURKAPS1	ZFP3
MCART2	TEKT1
SLC25A46	ALPPL2
SMEK2	GAL3ST1
C15orf48	IL17RC
BAG4	CYTH3
GREB1L	LOC100130933
PFKM	MAML2
PPFIA4	C1orf201
C1orf58	SPEF1
LILRA3	HBA2
NSF	RGL1
RPN1	NGFR
HIST1H2BJ	PHACTR2
C1orf124	CLIC6
ONECUT1	TAOK2
C5orf46	MATN3
TMEM55A	IL33
SMARCA5	C6orf145
AEN	FRAS1
PCBP2	ZNF276
SENP5	ACSL5
DDX46	CDH23
ADAM17	PRMT2
B4GALNT1	FLRT3
PIAS2	CHRDL1
NFU1	CD207
BBX	BTG2
SOCS4	SGSM1
HNRNPA1L2	TFAP2E
PDCL3	BTNL8
TTL	ZNF608
RDX	CEMP1
PPP1R2P3	CBFA2T3
ADA	BDH2
C10orf88	HTR3C
GPSM2	SGCG
ERMP1	FOXN3
PDCD2	CECR1
ISY1	PALM3
AKIRIN1	TRAPPC1
AIMP1	DUSP18
PLIN2	ZNF541
CCL7	SELO
FASTKD2	KIAA1543
GPX8	FOXD4L1
ZCCHC4	SHROOM3
ACTR2	SORBS1
DNAJB14	STAT5A
CBX1	NOTUM
ATG3	KIAA0495
B3GNT4	CD82
LMNB2	FOXD4
RAB2A	HLA-DPB1
SLAMF9	KCNA4
MIPOL1	GPER
GFAP	RADIL
GPR37	LYPLA2
SLC2A5	SPG7
CCDC110	C21orf71
ATP6V0A2	C1orf189
SLC37A3	GPR132
H2AFX	MECOM
GHITM	ALDH3A1
HNRPLL	PPOX
PPIAL4C	SNX33
PWWP2A	CBLN4
ALKBH2	RASSF5
METTL4	ARHGEF19
SLU7	MAPK8IP1
HNRNPF	C14orf180
SUGT1	GYPE
FBXL4	TANC1
FAM57B	SLC15A3
TNFRSF10A	CCDC11
EIF3E	LYPD2
C12orf41	ZBTB48
GPR157	CELF2
UBA3	SH3BGRL2
SFRS3	LOC643719
UBE2R2	LOC339047
TRIB3	CDKL2
PRPS2	LOC572558
RG9MTD2	GTF2IRD2
CMC1	NPEPL1
CTHRC1	NLRP9
HIST2H4A	SNX1
PDE12	KIAA0913
CLPX	C2orf81
COX7A2	HCN4
MST4	GFRA2
FGF5	ADH1C
SAE1	NMUR1
ARPP19	ATP13A2
USP10	TMEM150A
TRIP12	PDCD4
CCL26	WASH3P
EIF3H	TCEA3
TNPO3	NRGN
SARNP	CXorf41
MED14	HLA-DQB1
C14orf106	CES1
GCN1L1	CLDN5
TATDN1	C6orf155
POC5	FAM160A2
SYNCRIP	VTCN1
PL-5283	CCDC24
UMOD	LBXCOR1
PKP2	MKNK1
MRPS33	NEDD4L
SLC2A14	TMEM146
SNF8	LOC284900
FUBP3	ITGA10
RBBP5	SAMD11
SLC12A8	HIF3A
KIAA0391	PKD1
SEC61A1	USP2
NME6	TOB1
HEATR3	LPPR4
MRPL9	FAM198A
ATF2	UPK3B
ARPC1A	C17orf72
AOX2P	GATA2
UHRF2	CXorf30
KLHL15	ABCC6P2
C18orf55	CDIPT
IGLON5	TMC4
DNAJC7	ECSCR
FANCL	GYPC
UTP23	RBP2
MSI2	AGBL2
RNF7	ZNF750
RPLP0	SH3RF3
EIF5AL1	LOC388588
PHB2	ADCY2
METTL5	ANKFY1
POLR1E	COL16A1
IPPK	PLA2G6
RAB18	ZNF44
RAD17	C2
CLPB	PBX4
MRPS16	SPINLW1
IDH3A	PDE7B
BEND6	MZF1
C12orf34	AKT1
ATF1	FAM184A
GTF2H2	PCYT2
PANX1	SMARCA2
CASP8AP2	FOXO4
DUSP11	C1orf173
AASDHPPT	NCRNA00174
DNAJC2	AMOTL2
ZMAT2	DEGS2
TTC5	FUK
C9orf82	ZNF213
C17orf58	CCDC97
NRIP1	KIAA0247
LOC29034	XKR8
CCDC86	KLHL33
NFIL3	FAM183A
MRPL52	CCDC78
DNTTIP1	PRRT1
NSL1	OXT
CXorf56	CYP11A1
RFK	TREML1
CNOT10	SORCS2
ZBTB10	MMP28
UBXN7	CHRNA10
CCNB1IP1	HMGCS2
THUMPD2	RGNEF
POP7	MED16
KIAA0196	MYLK4
C8orf33	RXRG
SLC25A15	C19orf35
SLC15A4	TMEM213
HMBOX1	ARMC2
CREM	TSNAXIP1
TMEFF1	RGL2
C19orf40	VWA2
MTP18	DCXR
PARD3	RANBP3L
HS2ST1	ACAD8
RNF4	FAM92B
GTF2E2	SCRN2
MNAT1	UCN3
COX17	GJA4
ZRANB3	SULT1C2
CTSL1	FMO3
ZFP91	LCA5L
PATL1	MS4A8B
RNF160	CC2D1B
YY1	CCDC40
C12orf66	POM121L10P
TFB2M	CUL9
CDK5R1	MEAF6
KRAS	FER1L5
MRPS23	TRIM63
GPR63	MTMR3
CHMP4C	CPB2
SART3	SYF2
BEST3	NDN
DDX10	LOC121952
NDUFA8	FLJ10357
SPAG4	FAM41C
CNOT7	C8orf73
LRP8	SPTLC3
BRWD3	KDM6B
C5orf25	ULK2
UBA5	ERBB2
PPIA	TBX1
PALB2	SLC12A9
C12orf32	LOC388387
CCDC77	FAM124B
UQCRQ	STOML3
CDK5R2	ZNF682
SH2D5	SLCO3A1
SEPHS1	TSPAN7
LZIC	PLEKHM3
SBSN	CLEC9A
GNPDA2	CDSN
STAT1	GRM7
SNHG1	C20orf26
NUP85	CCDC19
PABPC3	SLC25A27
OR1F1	AGRN
RIC8B	ABCA3
ARMC8	CPSF3L
SGK196	PIK3C2B
ITGB3BP	ZNF599
C14orf147	SFTA3
TADA2A	EVI5L
RPS7	IQSEC2
PTPLAD1	C10orf26
SURF4	SPAG6
AGPS	ACAA1
SEC24D	ZFP36
SND1	CACNB4
LPGAT1	KIAA1908
CDC26	ZNF662
KARS	C10orf67
ADAM22	ZNF167
MANF	DIO3OS
RAP2C	GOLGA6L5
FBXO32	AQP7
C1orf31	ITGBL1
NUP153	NBEAL2
TBPL1	LOC80154
FGB	LOC100189589
CKAP4	C3orf47
RAD21L1	FHOD1
CHRNA9	FOXO3
FBXW11	KCNAB1
NME2P1	ZNF137
KIAA0406	KCNK5
SUDS3	WDR6
LSM6	CCDC84
CLTC	LOC91316
CBLL1	SLC1A7
GUF1	DGCR6
SLC26A2	FAT4
RALGPS2	AJAP1
LIPK	AKAP14
TSC22D2	CUBN
MFSD9	NPFF
UGT8	LMCD1
FBXL21	KCNK4
ORMDL2	C1QTNF2
RGS17	C20orf103
SEC22A	ZFP36L2
TBRG4	GDF5
LINGO2	NPIP
PSIMCT-1	CDK11A
RFC1	C22orf15
C2orf47	CHIT1
ERH	GPR20
CEP72	TSSK3
PSMD8	PEAR1
TRPM8	SEC14L4
HIST2H2AB	LOC145820
EIF2C3	PTPRB
KIF24	FLJ45244
YKT6	CA4
ADNP2	BBC3
MCART1	TYK2
TIMM10	CMA1
FLAD1	BCR
UBXN4	NFAT5
SLCO5A1	C20orf54
NUDT5	EDN3
C20orf141	LOC643008
LOC152225	PRR5-ARHGAP8
PPP2R3C	COL8A2
HIST1H2AH	MTHFR
PPIH	ZNF429
EMG1	PEG3
PTTG2	EVC
SLC7A11	B3GALT6
SMYD2	PPIEL
UBE3A	RRAS
TAF1D	RNF208
PPP1R8	SARM1
PSMC4	NCK2
C12orf52	KRTAP5-9
COX7C	LSAMP
DNAJC14	CDRT4
WAC	KCNJ5
DYNLL1	GLIPR1L2
FAM98A	RERG
DPP8	IL6R
ZNF280C	CMAH
TBL2	PNPLA7
MED6	DNAH1
PAXIP1	MEIS1
DCAF16	C10orf95
MRPL17	MUC21
C5orf36	TTC23L
DPYSL5	RENBP
HADHA	MPRIP
ATG10	CHST5
APCDD1L	GSG1L
TPBG	COL13A1
C18orf56	B9D2
THAP5	LOC648740
KIF5B	C2orf63
CCNG1	ABCA9
STT3B	LRRC31
PDCD5	MLPH
RLIM	KIF12
DCUN1D4	DDAH2
OTUB2	CHI3L2
SUB1	FAM65A
CCDC21	ZFYVE21
C14orf166	EGFL7
E2F3	CASP12
TMEM14A	UBA7
HSP90AB1	TCF25
POLE	SPATS1
STYK1	C16orf86
MORC4	SERPINB10
DBN1	CHST7
MCM3	PTCRA
ABHD10	CAPN8
SETD7	GLB1L3
STARD3NL	TMEM164
GUCA1A	OLFML2A
KLHL11	COL28A1
CCDC51	EPB49
HOXD12	ISYNA1
NIPAL4	PLA2G15
IGF2BP3	SPACA4
DPY30	COL29A1
APTX	WDR13
ECD	APLNR
GCH1	PRR12
HMGB3	DUSP26
NSA2	NYNRIN
ARL1	DYDC1
XPO5	GRM6
DPY19L1	SRGAP3
SNRPD2	WDR19
CAPZA2	ELF5
PSMB2	B3GNT1
RBM15	DMRTC1B
HDX	FAM188B
GTF2H2C	AHNAK
COQ10B	MORN5
SYNJ2	FAM173A
TSNAX	C14orf159
GTF2A2	MYH2
SLC25A13	AMBRA1
FIP1L1	GAPT
C10orf84	TRIM50
MRPL10	FYCO1
MAK16	FAM182A
SLC31A1	C3
SPATA5L1	C1QTNF9B
LSG1	CPEB3
NPM3	FOLR3
TMEM194B	NME3
KDM1A	ATP9B
ENO2	TMC8
PPIAL4G	DNASE1L3
CDC123	KIAA0240
BTBD1	BAD
KLRC2	C1QTNF9
GTF3C4	NFATC3
DSP	FLJ26850
THAP1	C2orf71
MAN1A2	ATP13A1
ASPH	GNAQ
ASAH2B	TMEM57
OAS3	GRAP
STMN1	CEP68
PAPOLA	MICALL2
C6orf153	WNT7B
DUT	GCOM1
OGFOD1	LCNL1
USP38	FHDC1
SNAPC5	DMAP1
SHQ1	ZNF784
ACAT2	ZNF264
TMEM85	TBC1D22A
SULF1	TGFB1I1
METTL8	ANGPT4
FUCA2	MTHFSD
METTL9	CXCL17
SMU1	TRAK2
WDR62	FAM13AOS
IPO5	C3orf15
FAM135A	INE2
RBMX2	EFCAB10
LMBRD2	C17orf28
C11orf58	SHROOM2
NAF1	HKR1
C17orf42	TMEM54
MAP2K6	C21orf34
MED7	C14orf73
ANKRA2	C20orf151
NIPAL1	FLI1
MRE11A	LRIT3
DFFA	MYO9B
LOC339535	ZNF438
RAB6A	UCP3
ADAM12	SFTPB
NCK1	SLC29A3
DSG4	ASMTL
C9orf84	FAM81B
HIST1H1B	KAT5
C10orf2	P2RY2
CDK4	VIP
MANEA	POU6F1
USMG5	KCNK15
ANKRD7	NTNG1
DEPDC4	TXNDC11
SFPQ	ZNF653
YEATS4	PPP1R12C
TNFRSF9	ZNF629
ERRFI1	USP4
LTV1	RAB11FIP4
ZZZ3	CC2D2B
LOC100130932	KRT4
IRAK1	HIC1
TMEM185B	KLF8
PLSCR1	FANK1
TAOK1	PARM1
LMX1A	CDK9
ZDHHC20	YSK4
STAM	RAB40B
ZFP62	ASPG
FSD1	SLC9A11
NOL8	PARVA
FKBP14	CEACAM8
CYP24A1	EXOC3L2
PSMD5	TTC29
KLHDC10	PLP1
ZNF770	C7orf26
DDX11	LOC100288778
SSR1	WFDC6
IARS2	EPHX2
PFDN2	CNN2
AMZ2	TMEM63B
KCNH7	CYB5D1
ZNF410	GAB1
RHOV	LPCAT3
CD109	MAN2C1
POLR3F	EFHD1
DYNC1LI1	KCNC4
STAG1	LENG1
FNTA	SFRS4
TDRG1	RNF135
HAUS3	FAM129A
CHD1L	UPF3A
ZNF695	CASQ1
CDV3	CNRIP1
TRMT12	SMTNL2
C3orf38	SEMA5A
DNAJA2	C10orf76
[truncated: 3,082 more rows]
